# Supplementary material
Source: PubMed Central journal article supplement (PMC1129093)

Normalized  $I_{pK}$

2.5

2.0

1.5

1.0

0.5

0.0

Control

AMPA

2 nA

20 ms

-80

-60

-40

-20

0

20

Potential (mV)

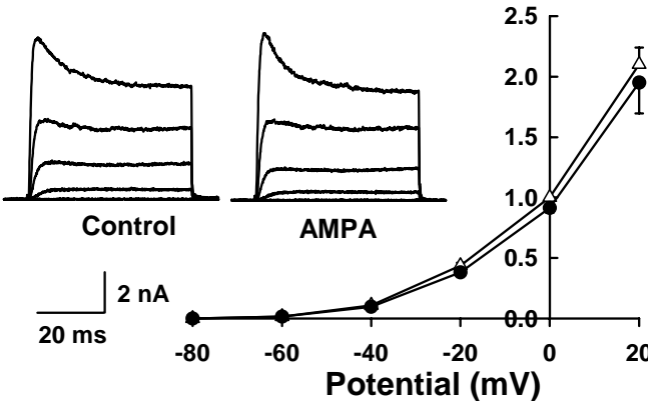

Supplement: pnas_0408514102_1.pdf [file pnas_0408514102_1.pdf]

**A**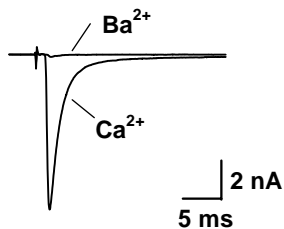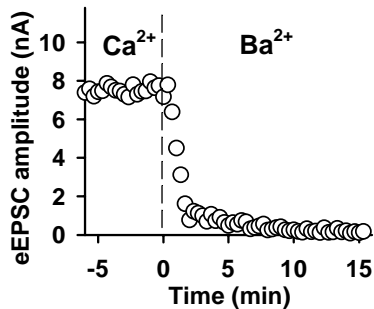**B**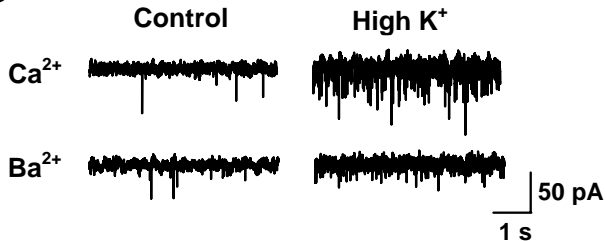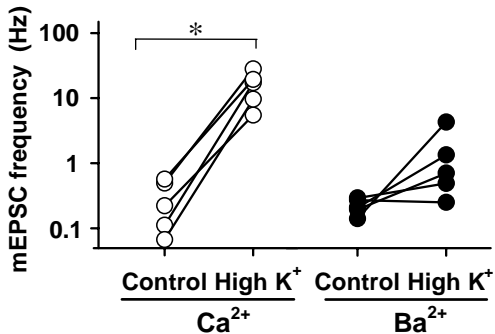

Supplement: pnas_0408514102_2.pdf [file pnas_0408514102_2.pdf]
